# Supplementary material
Source: PubMed Central journal article supplement (PMC6499706)

**Figure S1:** (A) Pie graph showing the proportion of different KRAS mutant alleles present in the cohort of cell lines employed. Heatmap showing the relative expression of genes that denote the quasi-mesenchymal and classical subtypes of pancreatic cancer. The models fall into either the classical or quasi-mesenchymal subtypes as indicated in the table. (B) The indicated pancreatic cancer cell lines expressing H2B-GFP were treated with 100 nM palbociclib (PD) and proliferation was determined by live cell imaging over the indicated time course. Representative images and quantification as a function of time is shown. The 7310 model lacks RB and is completely unresponsive to palbociclib (PD). (C) The MCF7 breast cancer cell line expressing H2B-GFP was treated with 100 nM palbociclib (PD) and proliferation was determined by live cell imaging over the indicated time course. (D) The indicated cell lines were treated with increasing doses of palbociclib (PD) and protein levels were determined by immunoblotting. (E) The 3226 cell line was treated with palbociclib (PD) for the indicated time-course and the indicated proteins were detected by immunoblotting.

**Figure S2:** (A) The indicated cell lines were treated with abemaciclib for 48 hours and the levels of the indicated proteins was determined by immunoblotting. (B) The RB-deficient 7310 cell line was treated with palbociclib (PD) for 48 hours and the levels of the indicated proteins was determined by immunoblotting. (C) The indicated gene levels were determined by RNA sequencing from the cells treated with palbociclib. (D) Stability of cyclin D1 and cyclin E1 was determined after cycloheximide (CHX) treatment for the indicated times in the presence and absence of PD0332991 (200 nM) pre-treatment. Protein expression was analyzed by immunoblotting. (E) The indicated cell lines were treated with palbociclib (PD) (200 nM) for 48 hours and the localization of cyclin D1 (upper row) and cyclin E1(lower row) was determined by immunofluorescent microscopy. Representative confocal images are shown. (F) Gene expression

analysis from cells treated with either palbociclib (PD), the combination with TAK228 or trametinib (at 100 nM) is shown. ETV4 and DUSP6 are established MEK regulated genes, while ACAT2 and ALDH3A1 are regulated by MTOR. The graph shows data from 4 independent cell lines that were sequenced in triplicates (\*\*p < 0.01, \*\*\*p < 0.001 as determined by t test). Immunoblot analysis to determine the effect of palbociclib (100 nM) +/- TAK228 (100 nM) on mitogenic signaling pathways following 48 hours exposure.

**Figure S3:** (A) Cell lysates from cell treated with DMSO or 200 nM palbociclib (PD) were subjected to immunoprecipitation with IgG, anti-p21, or anti-p27. Resultant immunoprecipitates were resolved and the indicated proteins detected by immunoblotting. The input serves as the control for relative protein abundance. (B) BrdU incorporation assay and immunoblot analysis for the 226 cell line transfected with CDK2 and non-target (NT) RNAi in the presence and absence of palbociclib (PD). The mean and SD are shown (\*\*\*p < 0.001 as determined by t test). (C) BrdU incorporation assay and immunoblot analysis for the indicated cell lines transfected with cyclin E1 and non-target (NT) RNAi in the presence and absence of palbociclib (PD). The mean and SD are shown (\*\*p < 0.01 as determined by t test). (D) BrdU incorporation assay and immunoblot analysis for the indicated cell lines transfected with cyclin D1 and non-target (NT) RNAi in the presence and absence of palbociclib (PD). The mean and SD are shown (\*\*p < 0.01, \*\*\*p<0.001 as determined by t test). (E) Immunoblot analysis for the indicated phosphorylation sites on CDK4 and CDK2.

**Figure S4:** (A) The indicated PDX models were randomized when tumor volume reached ~200 mm<sup>3</sup> for treatment with vehicle or palbociclib. Tumors were treated for 21 days and tumor volume was monitored every 48 hours. Data shows the mean and standard error of the mean. Greater than n=5 tumors mice were treated for each



condition. For all PDX models, except 827 PDX, the effect of palbociclib was significant for reducing tumor size ( $p < 0.01$ ). In the 827 PDX model there was rapid progression during the first 9 days of treatment. (B) Correlation between the cell cycle response observed in cell lines as determined by the AUC of BrdU incorporation inhibition versus the tumor volume at 20 days of treatment. (C) Association between the response to palbociclib and cyclin D1 and cyclin E1 base line gene expression levels, the established transcriptional subtypes of pancreatic cancer, and canonical mutations in PDX models. (D) Analysis of the relationship between the indicated gene expression levels (x-axis) and therapeutic response in PDX models. Neither KRAS nor RB1 are significantly associated with response  $p > 0.05$ . The expression of FLG and SMAD9 genes are associated with response  $p < 0.01$ .

**Figure S5:** (A) Heatmap of genes that correlated with response to palbociclib in PDX models. DNA replication represents one of the networks wherein the level of transcriptional repression is associated with response. (B) RNA sequencing from tumors that become resistant to palbociclib during the course of treatment compared against sensitive models. The log fold change relative to the vehicle control is plotted. The genes that were selectively repressed in the sensitive models are shown in red. The top gene ontologies of those genes are shown.

**Figure S6:** (A) Immunoblot for the levels of CDK2 in cells treated with the indicated agents. (B) Isobologram analysis showing dose response relationship with both palbociclib (PD) and TAK228. Heatmaps depict relative level of BrdU incorporation at 48 hours post treatment. Blue shading is associated with response, inset numbers show the fractional BrdU incorporation relative to DMSO control. (C) Live cell imaging of cells treated with DMSO, palbociclib (100 nM), TAK228 (100 nM), or the combination in

the RB deficient 7310 cell line (D) The mouse weight from a representative PDX cohort treated with palbociclib (PD) and the combination of palbociclib and TAK 228 (PD+TAK).

**Figure S7:** (A) Representative images of H&E and immunohistochemical staining of the indicated PDX models treated with palbociclib (PD) or the combination with TAK228. (B) Volcano plot shows genes selectively repressed by PD+TAK (red) vs. PD and PD+TAK (blue). Gene ontology terms for each gene set. (C) Heatmap of gene set variance analysis terms that are selectively repressed by the combination of palbociclib with TAK228 (PD+TAK).

Fig S1

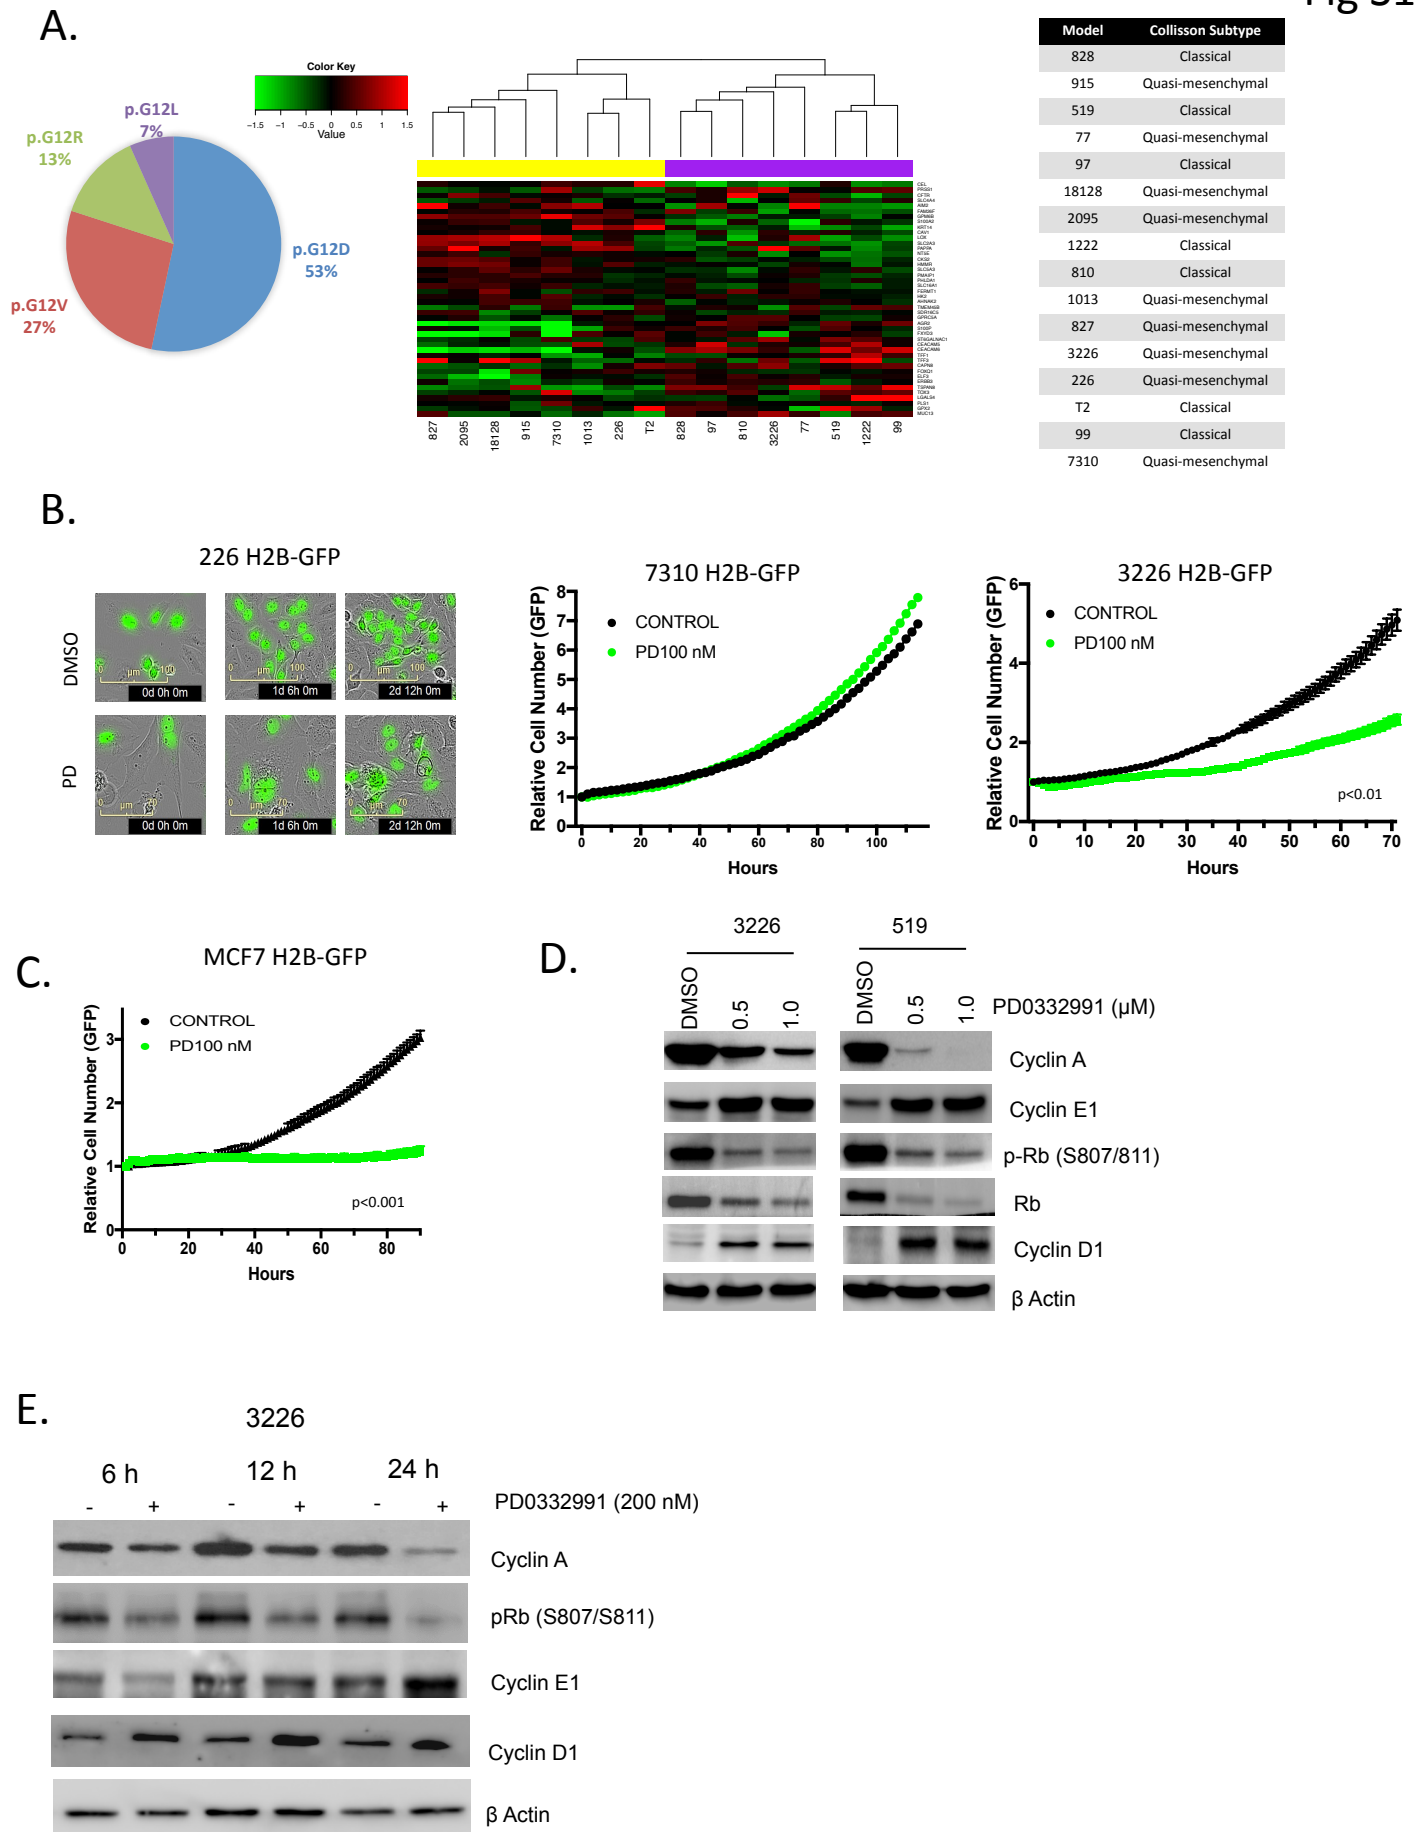

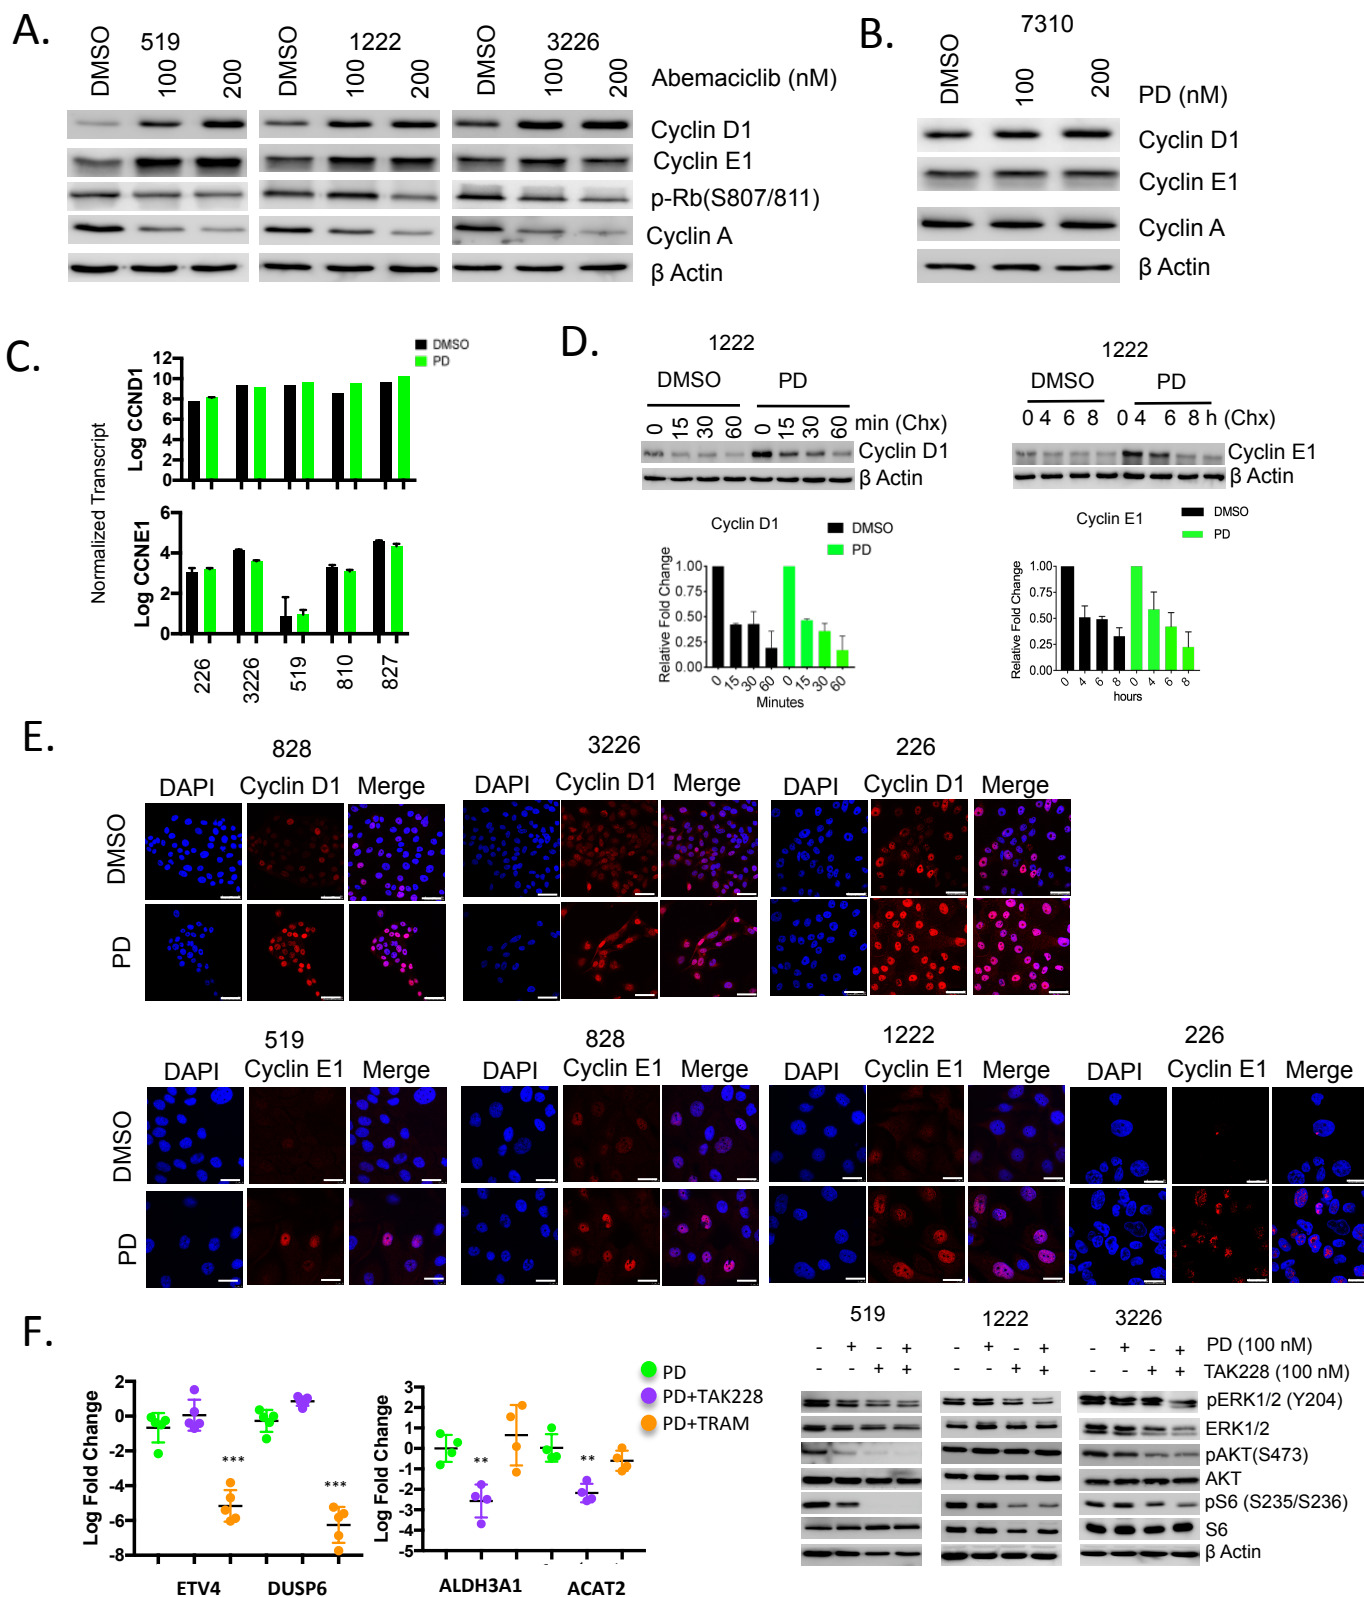

Fig S3

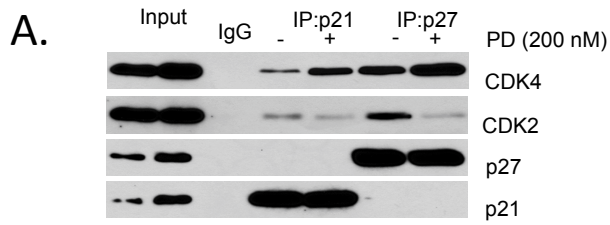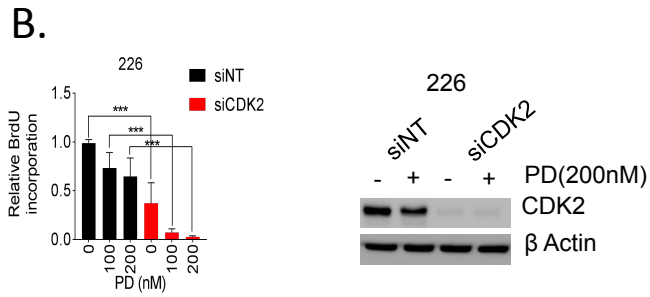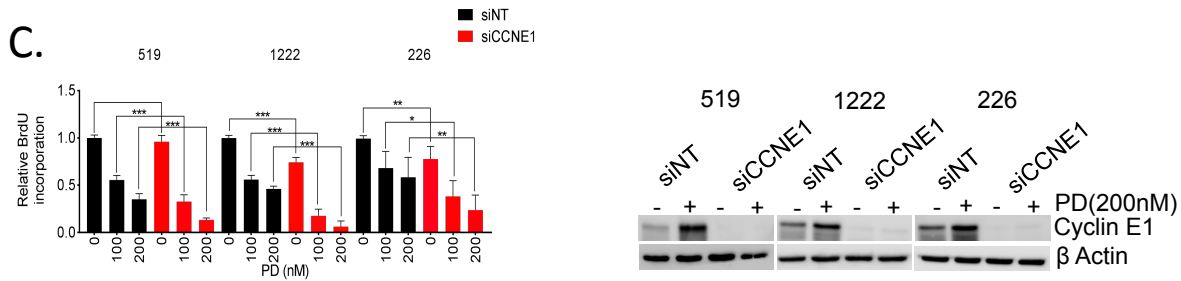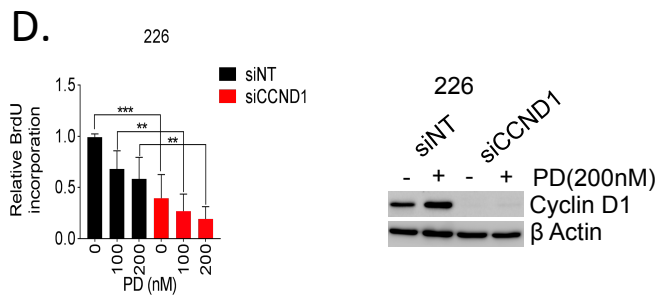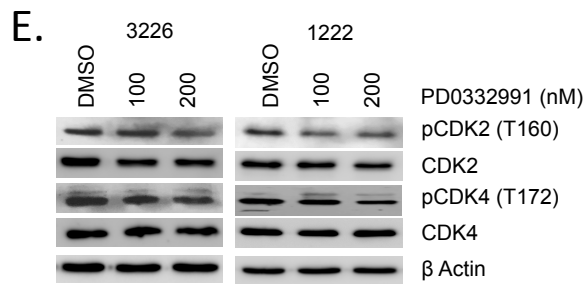

A.

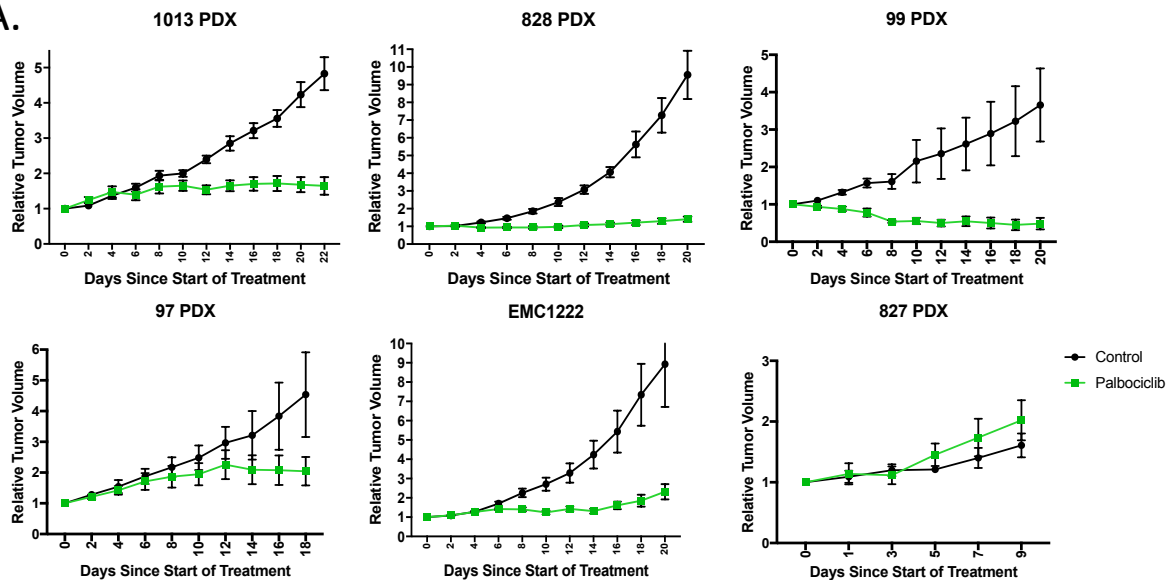

B.

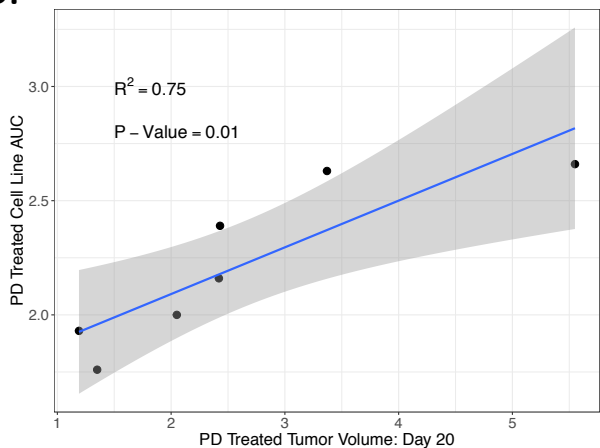

C.

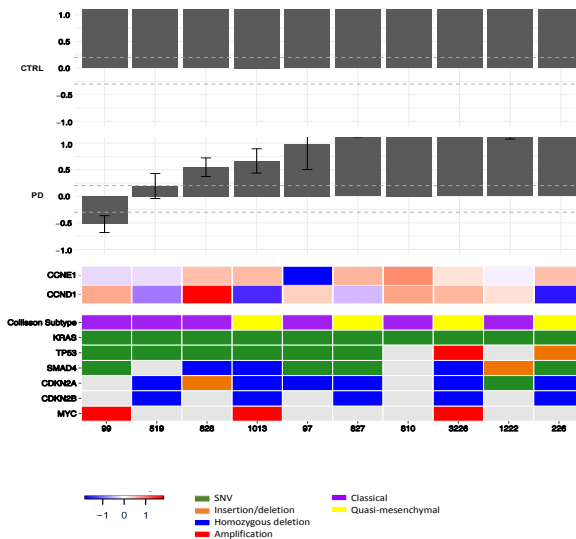

D.

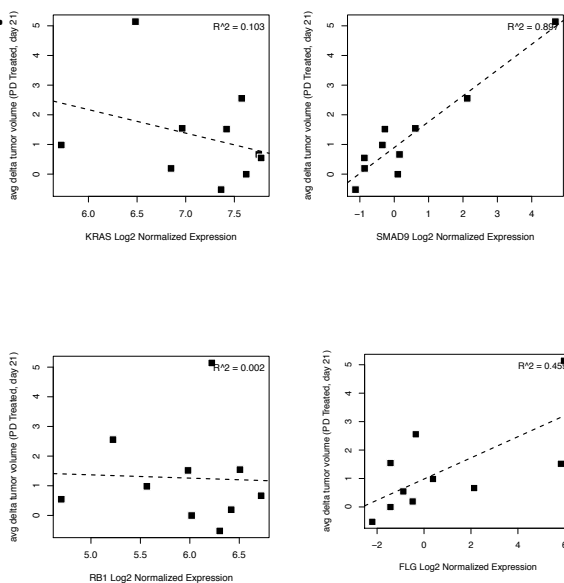

A.

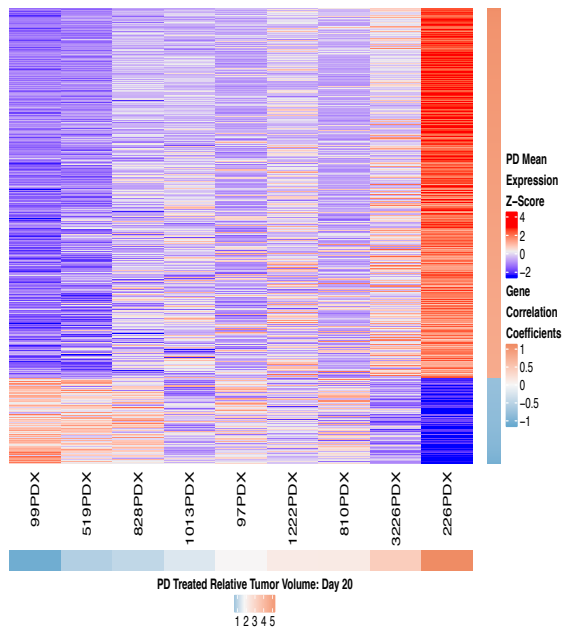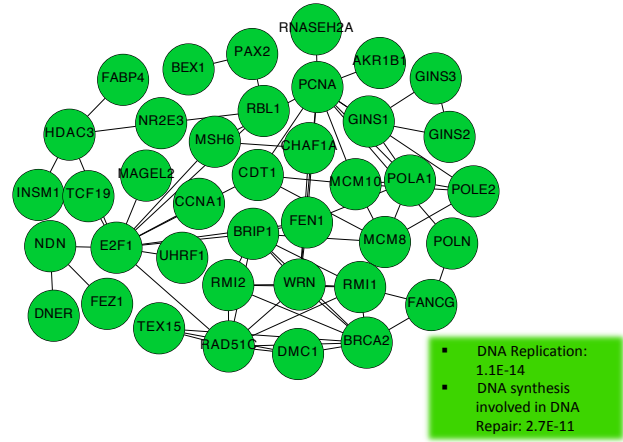

B.

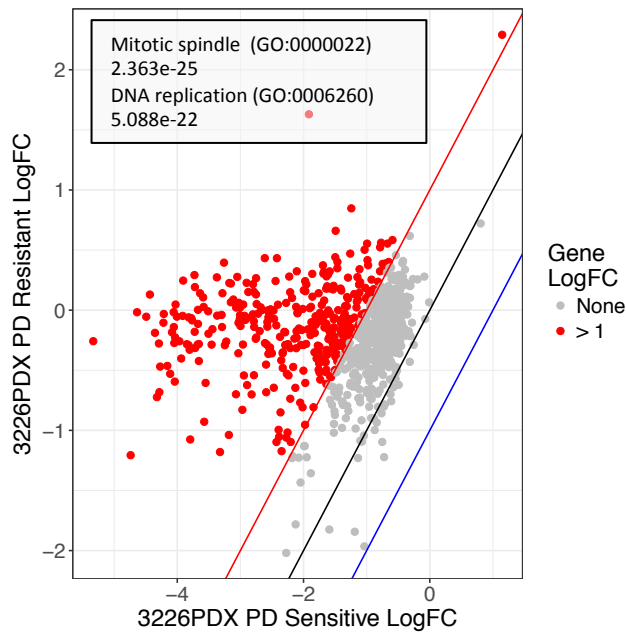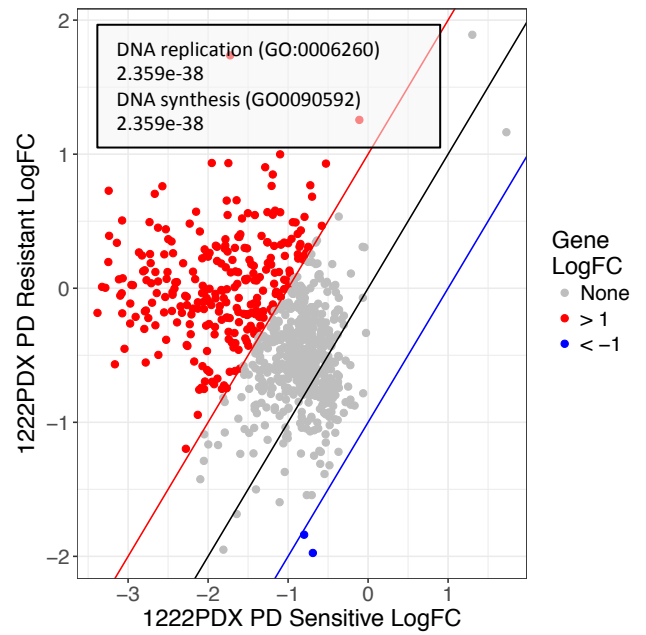

A.

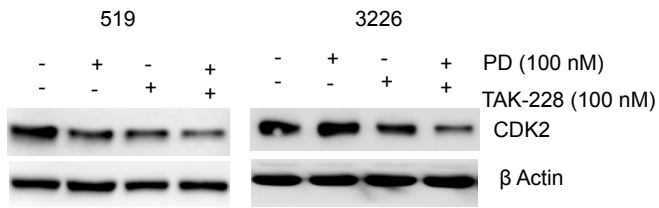

B.

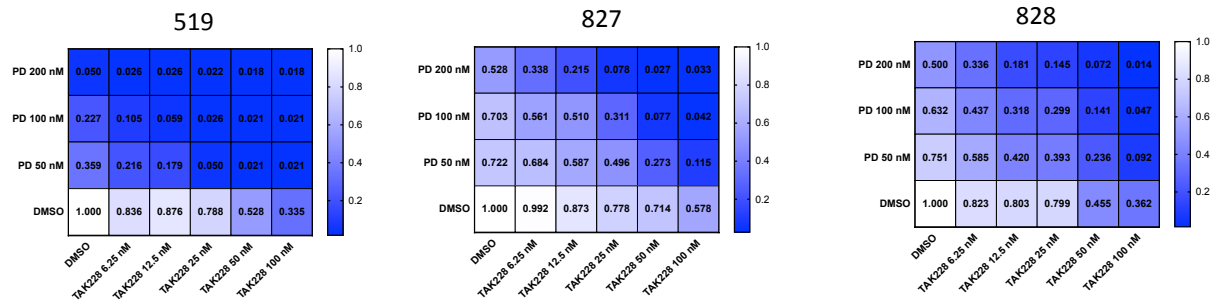

C.

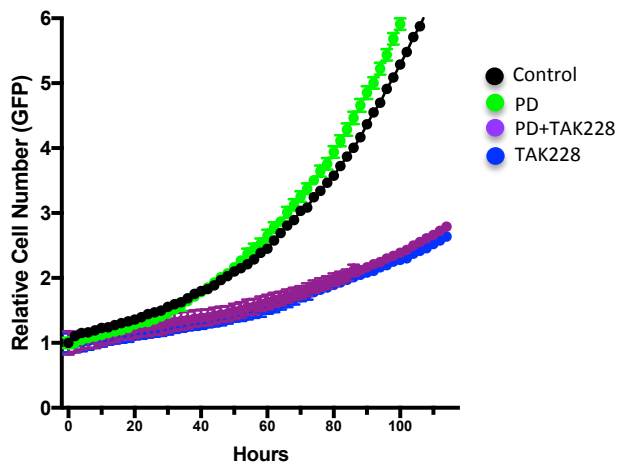

D.

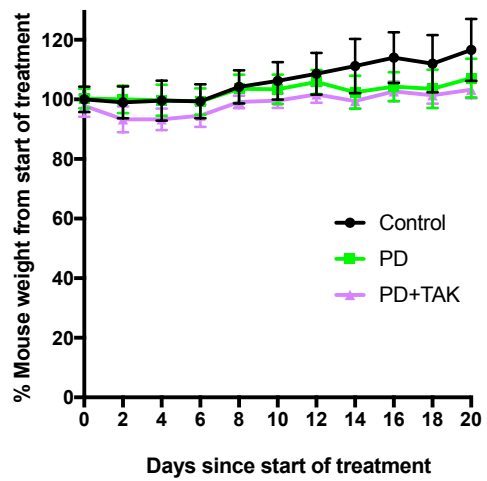

Supplement: NIHMS1513108-supplement-1.pdf [file NIHMS1513108-supplement-1.pdf]
